# Supplementary material
Source: publisher figshare collection journal article supplement (https://becaris.figshare.com/articles/dataset/_/26363029)
Supplement: Supplementary file 1 [file 1]

**Appendix 1. Research Participation Survey**

*Minor modifications were made to items as needed to facilitate phone administration.*

| **Survey Item** | **Response options** |
| --- | --- |
| What is your age? | Open-ended |
| How do you describe your gender? | - Man - Woman - Non-binary - Some other way (specify) |
| Are you of Hispanic, Latino, or Spanish origin? | - Yes - No |
| *If yes*, What is your background? Select as many as apply. | - Mexican - Puerto Rican - Cuban - Central American or South American - Other (specify) |
| How would you describe your race? **SELECT ALL THAT APPLY** | - Asian - Black / African-American / African - Hispanic / Latino / Spanish - Indian - Middle Eastern / North African - Native American or Alaskan Native - Native Hawaiian or Other Pacific Islander - White / Caucasian - None of these fully describe me (specify) |
| What languages are spoken regularly at home? | Open-ended |
| What is the highest grade or level of schooling you completed? | - Did not complete high school - High school graduate or equivalent (GED) - Some college or 2-year degree (including technical and vocational training) - 4-year college graduate - More than a 4-year college degree |
| **Respondents randomly assigned to one of the following priming questions.** | |
| How important is it to you to help others?  **OR**  How important is it to you to get cutting edge treatments if you are sick? | - Very important - Somewhat important - A little important - Not at all important |
| **[INTERVENING QUESTIONS ABOUT COVID-19 VACCINATION]** | |
| **The next section asks you how you might respond if you were invited to join a medical research study.** | |
| Imagine you are hospitalized with COVID-19. You have been in the hospital for 5 days, and you are getting sicker. You have a high fever. You need tubes in your nose to get enough oxygen.  Today, a new doctor tells you about a research study of a medicine that might work for COVID-19. The doctor explains that many patients take this medicine for other problems. Doctors do not know if it will work for COVID-19. Some small studies suggest it might help. However, there is a risk the medicine may cause complications. For example, you could get a urinary tract infection.  After answering your questions, the doctor says….[participants randomly assigned to one of the following 4 messages] | |
| 1. I know there have been reasons not to trust the medical system but taking part in this study is a good way to help others by finding new treatments for COVID-19.   **OR**   1. I know there have been reasons not to trust the medical system but taking part in this study is a good way to get a medicine that might work for COVID-19. This medicine is only available to people with COVID-19 if they are in the study.   **OR**   1. I know taking part in a research study can be difficult but taking part in this study is a good way to help others by finding new treatments for COVID-19.   **OR**   1. I know taking part in a research study can be difficult but taking part in this study is a good way to get a medicine that might work for COVID-19. This medicine is only available to people with COVID-19 if they are in the study. | |
| Based on the information you have so far, which way are you leaning right now? | - STRONGLY leaning AGAINST taking part in the study - SOMEWHAT leaning AGAINST taking part in the study - SOMEWHAT leaning TOWARDS taking part in the study - STRONGLY leaning TOWARDS taking part in the study |
| Why are you leaning that way? | Open-ended |
| To what extent if any would each of the following affect your willingness to take part in the study?   - - If my doctor recommended that I take part.   - If my friends or family members thought I should take part.   - If over 500 people had already taken part.   - If thousands of people are already taking this medicine for other problems.   - If the medicine was not FDA approved.   - If the study was being done by the National Institutes of Health (NIH).   - If the study was being done a drug company. | - A LOT LESS willing to take part. - SOMEWHAT LESS willing to take part. - It would make NO DIFFERENCE to me. - SOMEWHAT MORE willing to take part. - A LOT MORE willing to take part. |
| *Please indicate how much you agree or disagree with each of the following statements.*   - In general, I depend on numbers and statistics to help me make decisions about my health. - In general, I depend on my doctor's advice to help me make decisions about my health. - In general, I depend on what I see happening with my friends and family to help me make decisions about my health. - In general, I depend on my intuition or gut feelings to help me make decisions about my health. - In general, I depend on the news or social media to help me make decisions about my health. - In general, I depend on advice from certain friends and/or family members to help me make decisions about my health. - In general, I depend on my faith or religion to help me make decisions about my health"? | - Strongly disagree - Somewhat disagree - Somewhat agree - Strongly agree |
| **Please tell us a little about yourself and your experiences with healthcare.** | |
| How much do you trust the healthcare system to do what’s right for people like you? | - Do not trust at all - Trust a little - Trust somewhat - Trust a great deal |
| Doctors, nurses and others in the healthcare system usually treat me with respect. | - Strongly disagree - Somewhat disagree - Somewhat agree - Strongly agree |
| If you needed healthcare tomorrow, how confident are you that you could get it? | - Not at all confident - A little confident - Somewhat confident - Very confident |
| How often do you have someone help you read medical materials? | - Never - Occasionally - Sometimes - Often - Always |
| Do you think you have had COVID-19? | - Yes - No - Not sure |
| In general, how would you rate your overall health? | - Excellent - Very good - Good - Fair - Poor |
| In general, how would you rate your overall mental or emotional health? | - Excellent - Very good - Good - Fair - Poor |
| How would you describe your political affiliation? | - Republican - Democrat - Independent - Other (specify) - No political affiliation - Prefer not to say |
| How often in the past 12 months would you say you were worried or stressed about having enough money to pay for basic living expenses like housing, food, and healthcare? | - Never - Rarely - Sometimes - Frequently |
